# Supplementary material
Source: publisher site journal article supplement (http://www.spandidos-publications.com/6171/downloadSupplementary)

Figure S1. Viability of H9c2 cells treated with ISO or Ang II. H9c2 cells were treated with corresponding concentrations of (A) ISO and (B) Ang II. (n=3 experimental repeats/group) Data were analyzed using one-way ANOVA with Tukey post hoc test and are presented as the mean  $\pm$  SEM. \*\*\*\*P<0.0001. ISO, isoproterenol; Ang II, angiotensin II; RICH1, Rho GTPase-activating protein interacting with CIP4 homologs protein 1.

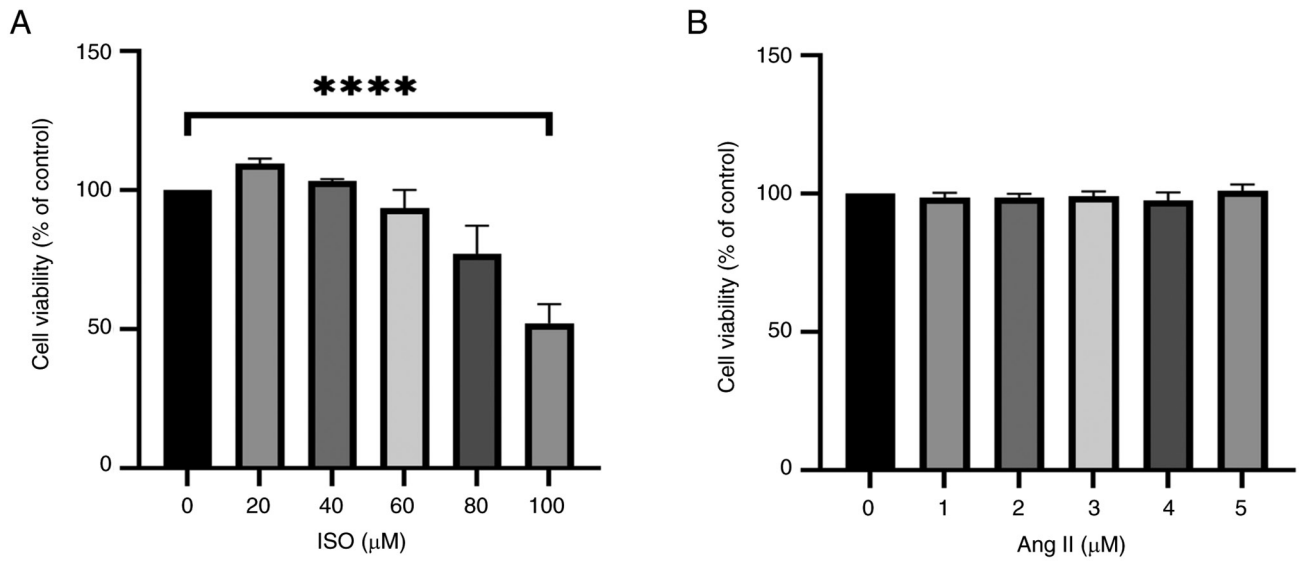

Figure S2. Protein expression levels of RICH1 in ISO or Ang II-treated H9c2 cells. Western blotting results of RICH1 treated with (A) ISO or (B) Ang II at different concentrations. (C and D) Statistical evaluation of western blots normalized to  $\alpha$ -tubulin (n=3 experimental repeats/group). Data were analyzed using one-way ANOVA with Tukey post hoc test and are presented as the mean  $\pm$  SEM. \*P<0.05. ISO, isoproterenol; Ang II, angiotensin II; RICH1, Rho GTPase-activating protein interacting with CIP4 homologs protein 1.

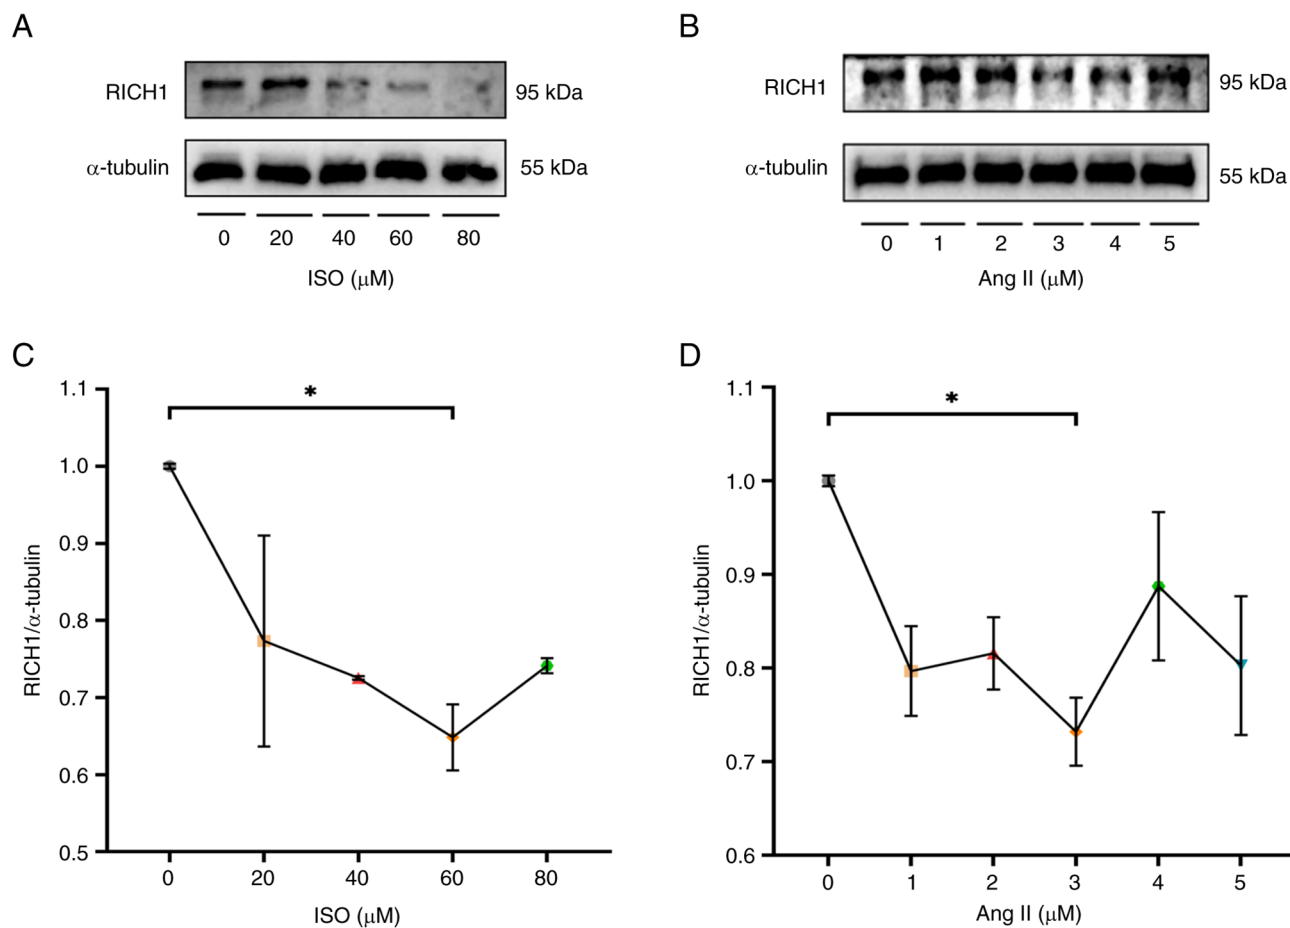

Supplement: Supplementary file 1 [file downloadSupplementary]
